# Supplementary material
Source: PubMed Central journal article supplement (PMC4618069)
Supplement: NIHMS723468-supplement.pdf [file NIHMS723468-supplement.pdf]

**Cell reports**

**Supplemental information**

# **Lethal cardiomyopathy in mice lacking transferrin receptor in the heart**

**Wenjing Xu<sup>1</sup>, Tomasa Barrientos<sup>1</sup>, Lan Mao<sup>2</sup>, Howard A. Rockman<sup>2</sup>, Anthony A. Sauve<sup>3</sup>, and Nancy C. Andrews<sup>1,4</sup>**

SUPPLEMENTAL FIGURES:

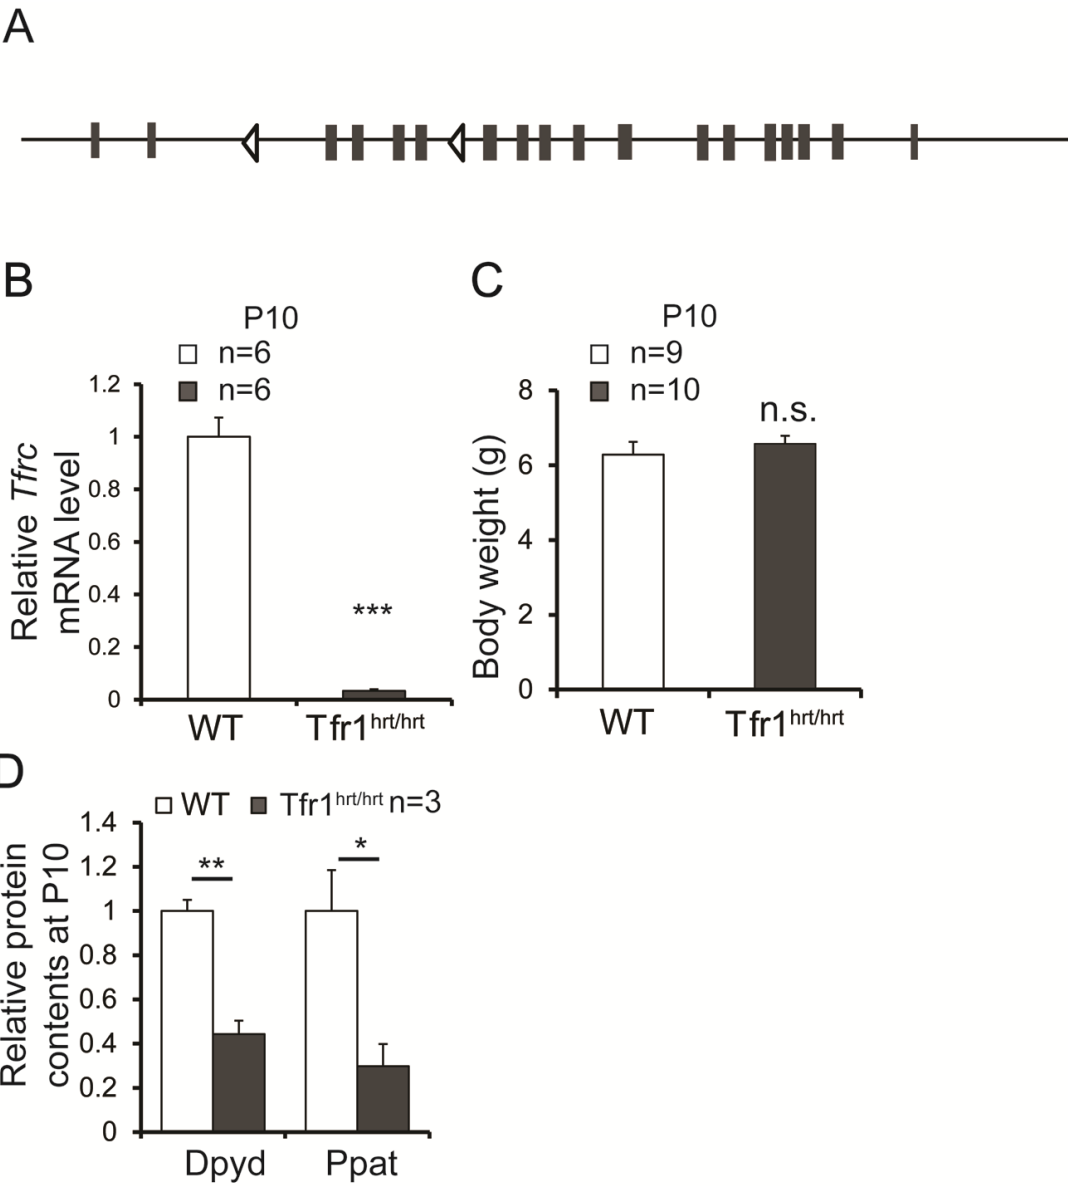

Figure S1

**A**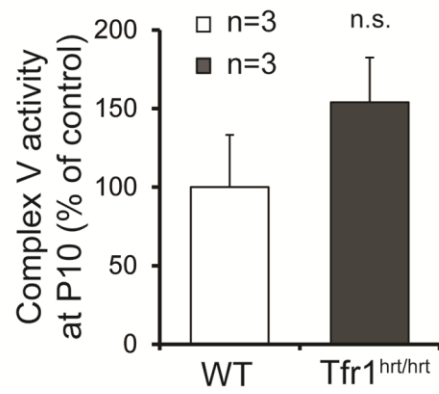**B**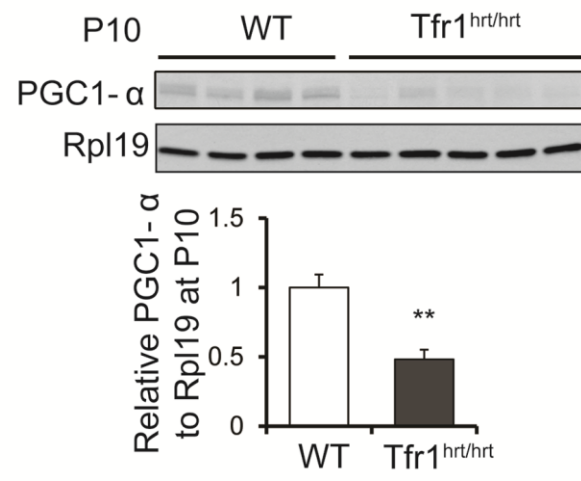**Figure S2**

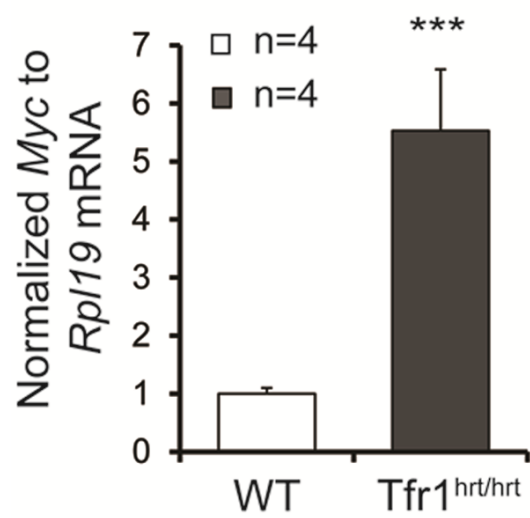

**Figure S3**

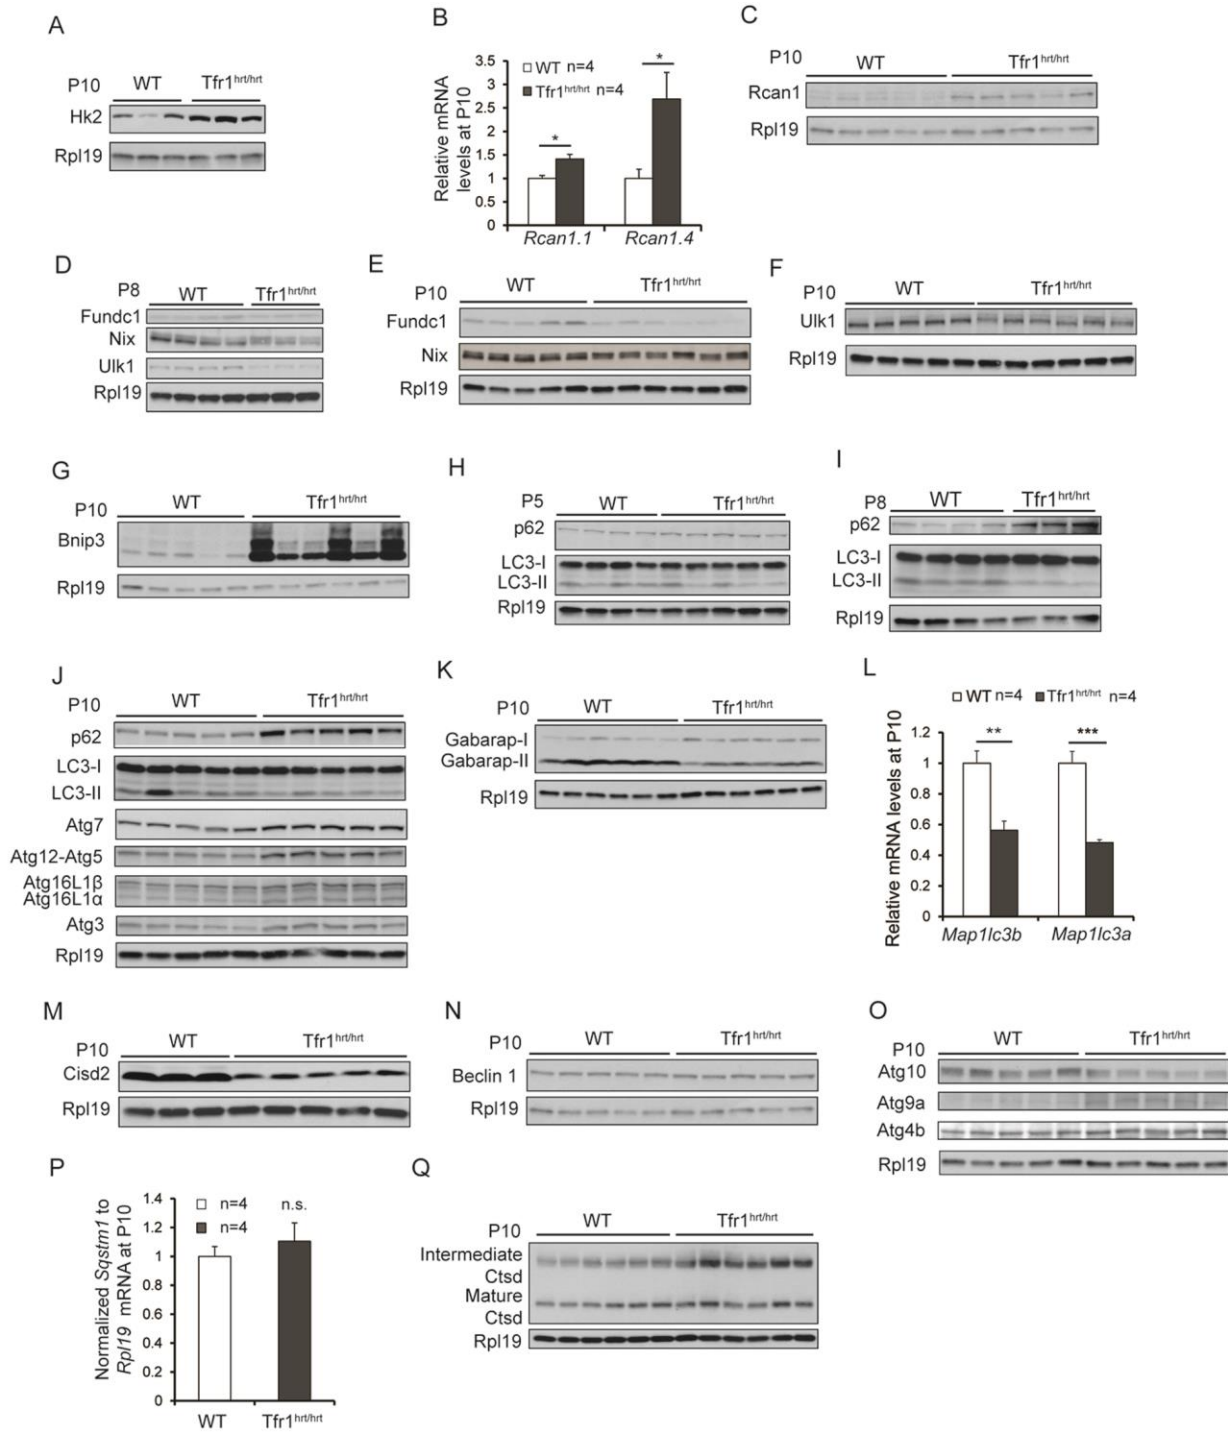

**Figure S4**

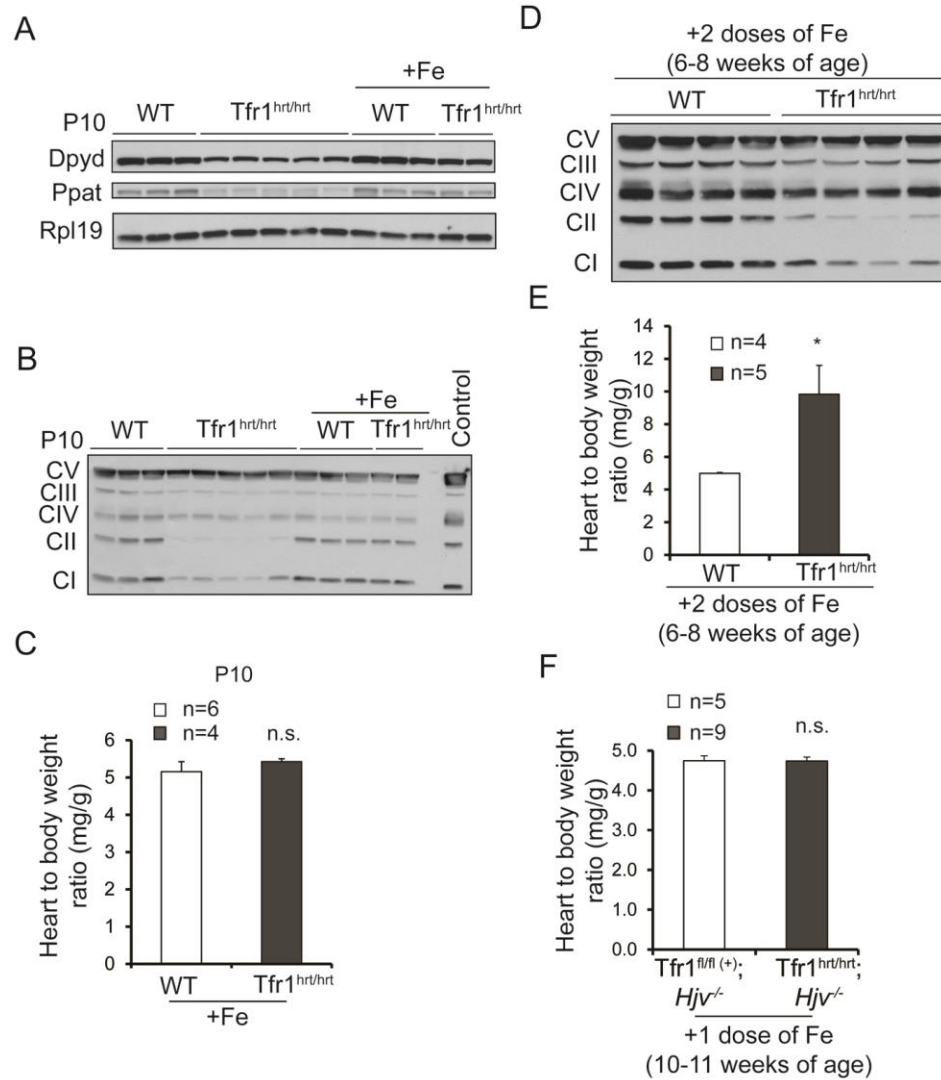

**Figure S5**

## **SUPPLEMENTAL FIGURE LEGENDS:**

### **Figure S1. Floxed *Tfrc* allele configuration and preliminary characterization of *Tfr1*<sup>hrt/hrt</sup> mice (related to Figures 1, 2).**

(A) Schematic diagram of floxed *Tfrc* allele allowing for deletion of exons 3-6. LoxP sites are shown as white triangles.

(B) Levels of *Tfrc* mRNA in hearts from littermate wild type (WT) and *Tfr1*<sup>hrt/hrt</sup> mice at P10.

(C) Body weights of littermate WT and *Tfr1*<sup>hrt/hrt</sup> mice at P10.

(D) Quantitation of cytoplasmic Fe-S cluster proteins Dpyd and Ppat at P10 (Fig 2E).

Data are presented as means  $\pm$  SEM. P-values were determined by one-way ANOVA.

The sample size (n) is indicated; \*p<0.05; \*\*p<0.01; \*\*\*p<0.001; n.s., not significant.

### **Figure S2. Complex V activity and PGC1- $\alpha$ expression (related to Figure 3).**

(A) Complex V enzymatic activity at P10.

(B) PGC1- $\alpha$  protein level by immunoblotting.

Data are presented as means  $\pm$  SEM. P-values were determined by one-way ANOVA.

The sample size (n) is indicated; \*\*p<0.01; n.s., not significant.

### **Figure S3. *Myc* mRNA (related to Figure 4).**

Data are presented as means  $\pm$  SEM. P-values were determined by one-way ANOVA.

The sample size (n) is indicated; \*\*\*p<0.001.

### **Figure S4. Immunoblot detection of proteins and real-time PCR measurement of RNAs of genes involved in autophagy and mitophagy in hearts from WT and *Tfr1*<sup>hrt/hrt</sup> mice (related to Figure 5).**

(A-K,M,N,O) Multiple autophagy- and mitophagy-related proteins were examined by immunoblotting 10-, 8- and 5-day old littermate heart samples as indicated in each panel.

(L) mRNA levels for *Map1lc3b* and *Map1lc3a*.

(P) Normalized levels of p62 (Sqstm1) mRNA were similar in hearts from WT and Tfr1<sup>hrt/hrt</sup> littermates at 10 days of age.

(Q) Immunoblot showing increased Cttd in hearts from Tfr1<sup>hrt/hrt</sup> mice.

Data are presented as means ± SEM. P-values were determined by one-way ANOVA.

The sample size (n) is indicated; \*p<0.05; \*\*p<0.01; \*\*\*p<0.001; n.s., not significant.

**Figure S5. Ongoing iron loading was necessary to rescue Tfr1<sup>hrt/hrt</sup> mice (related to Figure 6).**

(A) Amounts of Fe-S cluster proteins Dpyd and Ppat in hearts from 10-day old WT and Tfr1<sup>hrt/hrt</sup> mice untreated or treated with iron dextran.

(B) Representative ETC complex proteins in hearts from 10-day old WT and Tfr1<sup>hrt/hrt</sup> mice untreated or treated with iron dextran.

(C) Heart weight to body weight ratios at P10 for WT and Tfr1<sup>hrt/hrt</sup> littermates treated with 1 dose of iron dextran treated on P3.

(D) Representative ETC complex proteins in hearts from 6-8 week old WT and Tfr1<sup>hrt/hrt</sup> mice treated with 2 doses of iron dextran (at P3 and P7).

(E) Heart weight to body weight ratios at 6-8 weeks for WT and Tfr1<sup>hrt/hrt</sup> mice treated with 2 doses of iron dextran (at P3 and P7).

(F) Heart to body weight ratios at 10-11 weeks for Tfr1<sup>fl/fl(+)</sup>; Hjv<sup>-/-</sup> and Tfr1<sup>hrt/hrt</sup>; Hjv<sup>-/-</sup> mice treated with iron dextran only at P3.

Data are presented as means  $\pm$  SEM. P-values were determined by one-way ANOVA.

The sample size (n) is indicated; \*p<0.05; n.s., not significant.

## SUPPLEMENTAL EXPERIMENTAL PROCEDURES

### Primers for Genotyping mice by PCR

| <b>Gene<br/>name</b>      | <b>Forward primer sequence</b>     | <b>Reverse primer sequence</b> |
|---------------------------|------------------------------------|--------------------------------|
| <i>Tfrc</i>               | 5'-<br>CAGTAATCCCAGAGGAATCATTAG-3' | 5'-CTAAACCGGGTGTATGACAATG-3'   |
| <i>Cre</i>                | 5'-CCATATTGGCAGAACGAAAAC-3'        | 5'-GCTTCAAAAATCCCTTCCAGG-3'    |
| <i>Hjv</i> WT             | 5'-GAATGGCTTCCTTCCATCAA-3'         | 5'-ATCTTCAAAGGCTGCAGGAA-3'     |
| <i>Hjv</i> <sup>-/-</sup> | 5'-CGGATGGTTTTTGGCAGTTAG-3'        | 5'-GCCTTTACGATATCTCAGTCC-3'    |

### Electron Microscopy

The heart was removed and rinsed quickly in cold Krebs-Henseleit buffer (Krebs and Henseleit, 1932), and then immersed in 5% glutaraldehyde buffer. Tissue for electron microscopic examination were post-fixed for 1 hr in 2% osmium tetroxide, dehydrated through successive acetones, infiltrated with Epon (EM bed 812; Electron Microscopy Sciences) embedded, and polymerized in a 70°C oven overnight. Epon blocks were trimmed and ultrathin sections (70nm) were cut on a Reichert-Jung Ultracut E microtome (Leica Microsystems, Wetzlar, Germany) and collected on copper mesh grids. Sections were counterstained with uranyl acetate and lead citrate and examined in Philips CM-12 electron microscope (FEI, Hillsboro, OR). Samples were prepared and imaged by Duke University Medical Center Research Electron Microscopy Services.

## Western Blot Analysis

Mouse hearts were homogenized in 15 volumes of ice-cold RIPA buffer in the presence of protease inhibitors and phosphatase inhibitors (Roche) using glass homogenizers. Protein lysates were collected as the supernatant after centrifugation at 14,000 rpm for 15 min at 4 °C. Protein concentrations were determined using the DC protein assay (Bio-Rad). Antibodies were used recognizing Dpyd, Cathepsin D, Tom20, PGC1- $\alpha$  (Santa Cruz Biotechnology), LC3, Gabarap, p62, Beclin-1, Ulk1, Atg3, Atg4B, Atg7, Atg5, Atg12, Atg16L1, Bnip3, Nix, H-Ferritin (Cell Signaling Technology), Atg10 (ThermoFisher Scientific), Fundc1 (Aviva Systems Biology), Rcan1 (Abgent), Rpl19 (Sigma-Aldrich), Tfr1 (Invitrogen), Ppat and Atg9A (Novus Biologicals). Total OXPHOS Rodent WB Antibody Cocktail was purchased from Abcam.

## RNA Extraction, Microarray Gene Expression Analysis and PCR

Total heart RNA was isolated from flash-frozen tissue using the RNeasy Fibrous Tissue Mini Kit (Qiagen) and reverse transcribed as previously described (Schmidt et al., 2008). For the microarray analysis, we used the Affymetrix GeneChip® Mouse Genome 430 2.0 Array. A minimum of 200 ng RNA was used for each sample. RNA samples were processed by the Duke Microarray Shared Resource Services. Results have been deposited online (Xu and Andrews, 2015). Transcript abundance was quantified by 2-step real-time PCR, using amplification conditions as previously described (Schmidt et al., 2008). Primers were summarized below and Rpl19 was used as an internal control.

| <b>Gene name</b> | <b>Forward primer sequence</b> | <b>Reverse primer sequence</b> |
|------------------|--------------------------------|--------------------------------|
| <i>Tfr1</i>      | 5'-TCAAGCCAGATCAGCATTCTC-3'    | 5'-AGCCAGTTTCATCTCCACATG-3'    |

|                      |                                              |                                             |
|----------------------|----------------------------------------------|---------------------------------------------|
| <i>Nppa</i>          | 5'-TCGTCTTGGCCTTTTGGCT-3'                    | 5'-TCCAGGTGGTCTAGCAGGTTCT-3'                |
| <i>Nppb</i>          | 5'- AAGTCCTAGCCAGTCTCCAGA-3'                 | 5'- GAGCTGTCTCTGGGCCATTTTC-3'               |
| <i>Myh7</i>          | 5'-GTGCCAAGGGCCTGAATGAG-3'                   | 5'-GCAAAGGCTCCAGGTCTGA-3'                   |
| <i>Acta1</i>         | 5'-ATGTGCGACGAAGACGAGACCA-3'                 | 5'-AGGGTCAGGATACCTCGCTTG-3'                 |
| <i>Polrmt</i>        | 5'-CTCCTCCCACATGATGCTGAC-3'                  | 5'-AATTGCTCGCGGCATACCT-3'                   |
| <i>Nd4</i>           | 5'-CATCACTCCTATTCTGCCTAGCAA-3'               | 5'-TCCTCGGGCCATGATTATAGTAC-3'               |
| <i>Cytb</i>          | 5'-GCCACCTTGACCCGATTCT -3'                   | 5'-TTGCTAGGGCCGCGATAAT-3'                   |
| <i>Cox3</i>          | 5'-CGGAAGTATTTTTCTTTGCAGGAT-3'               | 5'-CAGCAGCCTCCTAGATCATGTG-3'                |
| <i>Ppargc1<br/>a</i> | 5'-<br>AGAAGTCCCATACACAACCGCAGTCGCA<br>A -3' | 5'-<br>CTTGGAGCTGTTTTCTGGTGCTGCAAGG<br>A-3' |
| <i>Ppargc1<br/>b</i> | 5'-GCTCTGGTAGGGGCAGTGA-3'                    | 5'-TCCTGTAAAAGCCCGGAGTAT-3'                 |
| <i>Itgb1bp3</i>      | 5'-TACAGCCAACGCTACTTCCT-3'                   | 5'-GGGACTTCATGCCATCTAAA-3'                  |
| <i>Slc3a2</i>        | 5'-TGATGAATGCACCCTTGACTTG-3'                 | 5'-TCCCCAGTGAAAGTGGA-3'                     |
| <i>Slc7a5</i>        | 5'-TGGTCTTCGCCACCTACTTG-3'                   | 5'-AAGCCGAGCAAAATGATGAG-3'                  |
| <i>Art1</i>          | 5'-CAGGGGCTACTCCTTTTTCC-3'                   | 5'-CCCAGACCTGCACTTCTTTT-3'                  |
| <i>Art4</i>          | 5'-AAGAAAAGAAGTGCAGGTCTGG-3'                 | 5'-AGAGCAGGAAGCAGAAATGG-3'                  |
| <i>Art5</i>          | 5'-TGTGTCTCAAGAGCAGTCG-3'                    | 5'-CAACTCTGGTTGGACAGGT-3'                   |
| <i>Ppara</i>         | 5'-GCCTGTCTGTCGGGATGT-3'                     | 5'-GGCTTCGTGGATTCTCTTG-3'                   |
| <i>Rxrg</i>          | 5'-CCGCTGCCAGTACTGTCTG-3'                    | 5'-ACCTGGTCCTCCAAGGTGAG-3'                  |
| <i>Fatp1</i>         | 5'-CGCTTTCTGCGTATCGTCTG-3'                   | 5'-GATGCACGGGATCGTGTCT-3'                   |
| <i>Rcan1.1</i>       | 5'-TCGACTGCGTAGATGGAGG-3'                    | 5'-TGGTGTCTTGTTCATATGTTCTG-3'               |
| <i>Rcan1.4</i>       | 5'-CTTGTGTGGCAAACGATGATG-3'                  | 5'-TGGTGTCTTGTTCATATGTTCTG-3'               |
| <i>Map1lc3<br/>b</i> | 5'-CGTCCTGGACAAGACCAAGT-3'                   | 5'-ATTGCTGTCCCGAATGTCTC-3'                  |
| <i>Map1lc3</i>       | 5'-TGTCTGATAAGACCAAGT-3'                     | 5'-TTCATCCTTCTCCTGTTTCAT-3'                 |

|                |                                      |                                          |
|----------------|--------------------------------------|------------------------------------------|
| <i>a</i>       |                                      |                                          |
| <i>Lpin1</i>   | 5'-CCTTCTATGCTGCTTTTGGAACC-3'        | 5'-GTGATCGACCACTTCGCAGAGC-3'             |
| <i>Epas1</i>   | 5'-TAAAGCGGCAGCTGGAGTAT-3'           | 5'-ACTGGGAGGCATAGCACTGT-3'               |
| <i>Slc2a1</i>  | 5'-GCTTATGGGCTTCTCCAAACT-3'          | 5'-GGTGACACCTCTCCCACATAC-3'              |
| <i>Slc16a3</i> | 5'-TCACGGGTTTCTCCTACGC-3'            | 5'-GCCAAAGCGGTTACACAC-3'                 |
| <i>Pdk1</i>    | 5'-GCTACTCAACCAGCACTCCT-3'           | 5'-CCTGGTGATTTTCGCATTT-3'                |
| <i>Lonp1</i>   | 5'-ATGGTGGAGGTTGAGAATGTAG-3'         | 5'-TGGTCTCTTCCAGAACATCTTG-3'             |
| <i>Bnip3</i>   | 5'-GGCGTCTGACAACTTCCACT-3'           | 5'-AACACCCAAGGACCATGCTA-3'               |
| <i>Ldha</i>    | 5'-AGGCTCCCCAGAACAAGATT-3'           | 5'-TCTCGCCCTTGAGTTTGTCT-3'               |
| <i>Vegfa</i>   | 5'-<br>CCTGGTGGACATCTTCCAGGAGTACC-3' | 5'-GAAGCTCATCTCTCCTATGTGCTGGC-<br>3'     |
| <i>Ndrp1</i>   | 5'-CATTTTGCTGTCTGCCATG-3'            | 5'-CCATGCCAATGACACTCTTG-3'               |
| <i>Hk2</i>     | 5'-TGATCGCCTGCTTATTCACGG-3'          | 5'-AACCGCCTAGAAATCTCCAGA-3'              |
| <i>Gpi1</i>    | 5'-GCCAAAGTGAAAGAGTTTGGA-3'          | 5'-ATGGAAAGTCCAATGGCTGA-3'               |
| <i>Pfkl</i>    | 5'-CTGCTGGTGATTGGTGGCTTTG-3'         | 5'-TTGCTGATGGTGGCTGGGATG-3'              |
| <i>Aldoa</i>   | 5'-GTGGGAAGAAGGAGAACCTG-3'           | 5'-CTGGAGTGTTGATGGAGCAG-3'               |
| <i>Tpi</i>     | 5'-CCAGGAAGTTCTTCGTTGGGG-3'          | 5'-CAAAGTCGATGTAAGCGGTGG-3'              |
| <i>Gapdh</i>   | 5'-CATGGCCTTCCGTGTTCTTA-3'           | 5'-GCGGCACGTCAGATCCA-3'                  |
| <i>Pgk1</i>    | 5'-CTCCGCTTTCATGTAGAGGAAG-3'         | 5'-GACATCTCCTAGTTTGGACAGTG-3'            |
| <i>Pgam1</i>   | 5'-CTGTGCAGAAGAGAGCAATCC-3'          | 5'-CTGTCAGACCGCCATAGTGT-3'               |
| <i>Eno1</i>    | 5'-TGCGTCCACTGGCATCTAC-3'            | 5'-CAGAGCAGGCGCAATAGTTTTA-3'             |
| <i>Pkm2</i>    | 5'-TGTCTGGAGAAACAGCCAAG-3'           | 5'-TCCTCGAATAGCTGCAAGTG-3'               |
| <i>Sqstm1</i>  | 5'-GAAGAATGTGGGGGAGAGTGTGG-3'        | 5'-TGCCTGTGCTGGAACTTTCTGG-3'             |
| <i>Rpl19</i>   | 5'-AGGCATATGGGCATAGGGAAGAG-3'        | 5'-TTG ACC TTC AGG TAC AGG CTG TG-<br>3' |
| <i>c-Myc</i>   | 5'-CCTAGTGCTGCATGAGGAGA-3'           | 5'-TCTTCCTCATCTTCTTGCTCTTC-3'            |
| <i>Optn</i>    | 5'-CAAGTGACCTCTCTGTTTAAGG-3'         | 5'-GCCTGCTCCATCTTGATTT-3'                |

|              |                        |                        |
|--------------|------------------------|------------------------|
| <i>Atf4</i>  | GAGCTTCCTGAACAGCGAAGTG | TGGCCACCTCCAGATAGTCATC |
| <i>Ddit3</i> | GACTCAGCTGCCATGACTG    | GCGACAGAGCCAGAATAACAG  |
| <i>Fgf21</i> | TCCAAATCCTGGGTGTCAAA   | CAGCAGCAGTTCTCTGAAGC   |

## **Spectrophotometric Analysis of Activities of Single Respiratory Chain Complexes**

### **I–IV**

All reactions were performed using a computer-tunable spectrophotometer (Spectramax Plus Microplate Reader, Molecular Devices, Sunnyvale, CA) at 20-s intervals for 5 minutes at room temperature. The reaction conditions for assaying activity of each complex were described previously (Janssen et al., 2007; Spinazzi et al., 2011). The total volume of each reaction was 200  $\mu$ l. Each sample had three replicates for total activity for and inhibitor-insensitive activity. For complexes I and II, we measured 2,6-dichloroindophenol (DCIP) reduction by electrons accepted from decylubiquinol. The reduction of DCIP was followed by spectrophotometer at 600 nm. 20  $\mu$ g heart homogenates were used in each reaction for both complex I and complex II activity assays. Complex III activity was measured by following the reduction of cytochrome c at 550 nm. Complex IV activity was measured by following the oxidation of reduced cytochrome c at 550 nm. 3.6  $\mu$ g and 1  $\mu$ g of heart homogenate was used in each reaction for complex III and complex IV activity assays, respectively. The addition of standard respiratory chain inhibitors for each complex was used to ascertain the specificity of the enzymatic assays. The same amount of protein was used for each sample.

### **Statistical Analysis**

One-way ANOVA was performed when the comparison was between the means of WT and Tfr1<sup>hrt/hrt</sup>. Two-way ANOVA followed by Bonferroni *post-hoc* was performed for multiple comparisons. Survival analysis (**Fig 7E**) was performed using Logrank in Graphpad software.  $P < 0.05$  was considered statistically significant.

An independent statistical analysis for survival analysis was also performed by Dr. Kingshuk Roy Choudhury as follows:

We modelled the survival time as follows:

$$T_{ij} = \mu + \beta_j + \varepsilon_{ij}$$

Where  $T_{ij}$  is the survival time (in days) for the  $i$ -th mouse in the  $j$ -th group. The model explains this in terms of a baseline mean  $\mu$ , an effect  $\beta_j$  for the  $j$ -th group (relative to baseline) and inter-mouse variation  $\varepsilon_{ij}$ . We fit the model using ordinary least squares (1-way ANOVA).

For the NR rescue experiment, the baseline is Tfr1<sup>hrt/hrt</sup> with PBS (Table A). There is no significant improvement in mean survival when using just Tfr1<sup>hrt/hrt</sup> (0.625 days, p-value = 0.26, Table B). There is, however a significant improvement in the Tfr1<sup>hrt/hrt</sup> with NR group (2.29 days, p-value <0.001). In WT, the improvement is over 19.6 days (all observations were censored in this group).

Analysis of survival:

|                         | Effect | Std. Error | t value | P-value |
|-------------------------|--------|------------|---------|---------|
| Baseline                | 10.375 | 0.402      | 25.787  |         |
| Tfr1 <sup>hrt/hrt</sup> | 0.625  | 0.540      | 1.158   | 0.258   |

|                                 |        |       |        |        |
|---------------------------------|--------|-------|--------|--------|
| Tfr1 <sup>hrt/hrt</sup> with NR | 2.292  | 0.484 | 4.739  | <0.001 |
| WT with NR                      | 19.625 | 0.493 | 39.827 | <0.001 |
| WT with PBS                     | 19.625 | 0.569 | 34.491 | <0.001 |

## SUPPLEMENTAL REFERENCES:

Janssen, A.J.M., Trijbels, F.J.M., Sengers, R.C.A., Smeitink, J.A.M., van den Heuvel, L.P., Wintjes, L.T.M., Stoltenborg-Hogenkamp, B.J.M., and Rodenburg, R.J.T. (2007). Spectrophotometric Assay for Complex I of the Respiratory Chain in Tissue Samples and Cultured Fibroblasts. *Clinical Chemistry* 53, 729-734.

Schmidt, P.J., Toran, P.T., Giannetti, A.M., Bjorkman, P.J., and Andrews, N.C. (2008). The transferrin receptor modulates Hfe-dependent regulation of hepcidin expression. *Cell Metab* 7, 205-214.

Spinazzi, M., Casarin, A., Pertegato, V., Ermani, M., Salviati, L., and Angelini, C. (2011). Optimization of respiratory chain enzymatic assays in muscle for the diagnosis of mitochondrial disorders. *Mitochondrion* 11, 893-904.

Xu, W., and Andrews, N.C. (2015). Expression data from wildtype and Tfr1 heart KO mice. NCBI Gene Expression Omnibus GSE68745.
